# Supplementary material
Source: Springer Nature journal article supplement (https://www.springermedizin.de/resource/supplementary/12902_2013_317_MOESM1_ESM.pdf/9515774)

### The 1<sup>st</sup> tertile (n=674)

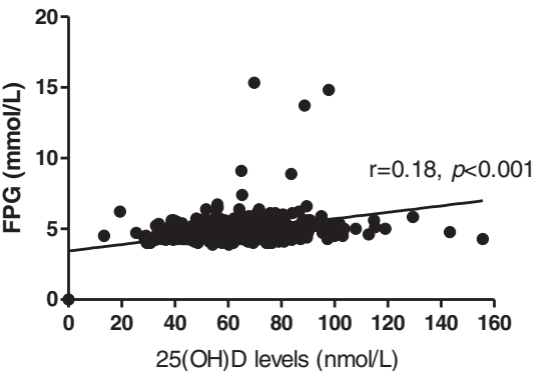

### The 2<sup>nd</sup> tertile (n=664)

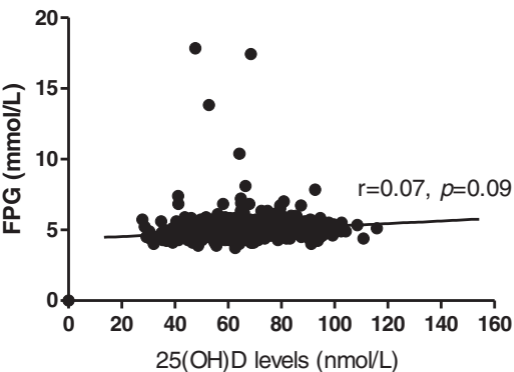

### The 3<sup>rd</sup> tertile (n=652)

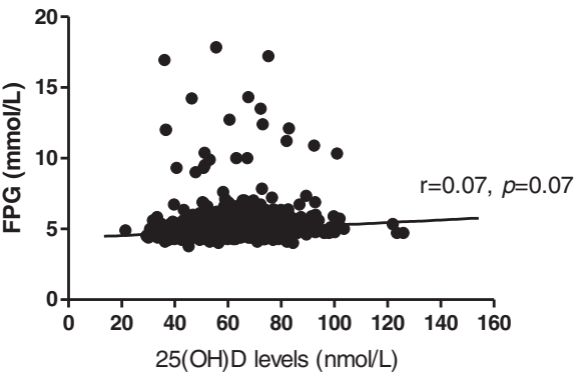

Supplement: MOESM1 [file 9515774]
